# Supplementary material for: 3D-Printable Sustainable Bioplastics from Gluten and Keratin
Source: MDPI journal article supplement (doi:10.3390/gels10020136), 2024-02-07
Supplement: s1 [file s1]

Supplementary Materials  
**3D-Printable Sustainable Bioplastics from Gluten  
and Keratin**

Jumana Rashid Mohammed Haroub Alshehhi<sup>1</sup>, Nisal Wanasingha<sup>1</sup>, Rajkamal Balu<sup>1</sup>, Jitendra P. Mata<sup>2</sup>, Kalpit Shah<sup>1</sup>, Naba K. Dutta<sup>1,\*</sup> and Namita Roy Choudhury<sup>1,\*</sup>

<sup>1</sup>*Chemical and Environmental Engineering, School of Engineering, STEM College, RMIT University, Melbourne, VIC 3000, Australia*

<sup>2</sup>*Australian Centre for Neutron Scattering (ACNS), Australian Nuclear Science and Technology Organisation (ANSTO), Lucas Heights, NSW 2232, Australia*

\*Author Correspondence: [naba.dutta@rmit.edu.au](mailto:naba.dutta@rmit.edu.au) (N.K.D.); [namita.choudhury@rmit.edu.au](mailto:namita.choudhury@rmit.edu.au) (N.R.C.)

## S1. Matrix-assisted laser desorption ionization time-of-flight (MALDI-TOF) mass spectrometry.

The molecular weight of keratin protein was measured by MALDI-TOF analysis using a rapifleX<sup>®</sup> MALDI instrument (Bruker). For sample preparation, about 5.0 mg of keratin powder and 5.0 mg of  $\alpha$ -cyano-4-hydroxycinnamic acid (matrix) were first separately dissolved in 1 ml of solution mixture made of acetonitrile and water (1:1 weight ratio) containing 0.1% trifluoroacetic acid (TFA) [1]. About 10  $\mu$ L of both sample and matrix solutions were mixed well, and 1  $\mu$ L of the mixture was dispensed onto a MALDI plate and dried. The mass spectrum of the sample (with 10000 shots collected) was measured in the range of 500 to 5000 m/z (as shown below).

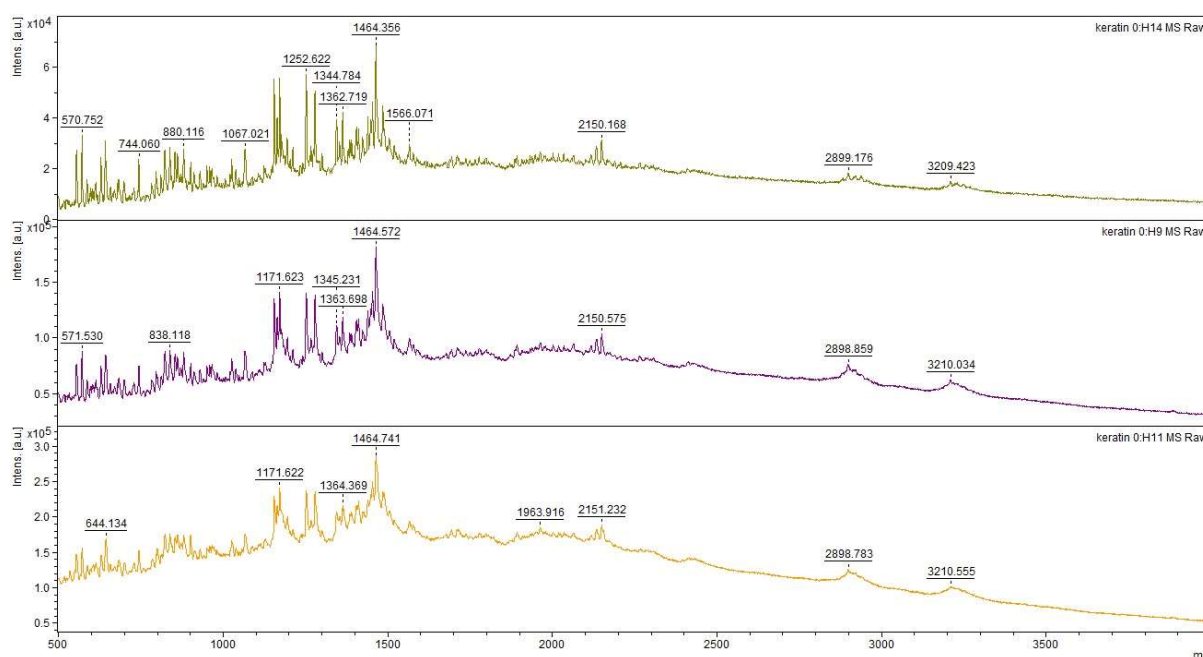

Figure S1: MALDI-TOF MS spectrum of keratin powder.

## S2. Deconvolution of Fourier transform infrared (FTIR) spectroscopy data.

The secondary structure of proteins in fabricated hydrogels was estimated by deconvoluting the amide-I region ( $1580\text{--}1690\text{ cm}^{-1}$ ) of the measured FTIR data (as shown below) using the MagicPlot Student software. The data was fit with multiple Gaussian peaks corresponding to  $\beta$ -sheets ( $1684\text{ cm}^{-1}$ ),  $\beta$ -turns ( $1671\text{ cm}^{-1}$ ), random coil and  $\alpha$ -helices ( $1650\text{ cm}^{-1}$ ), intramolecular  $\beta$ -sheets ( $1631\text{ cm}^{-1}$ ), intermolecular  $\beta$ -sheets ( $1615\text{ cm}^{-1}$ ), and glutamine side chain. ( $1596\text{ cm}^{-1}$ ) [2]. The percentage of secondary structures were calculated from obtained peak areas.

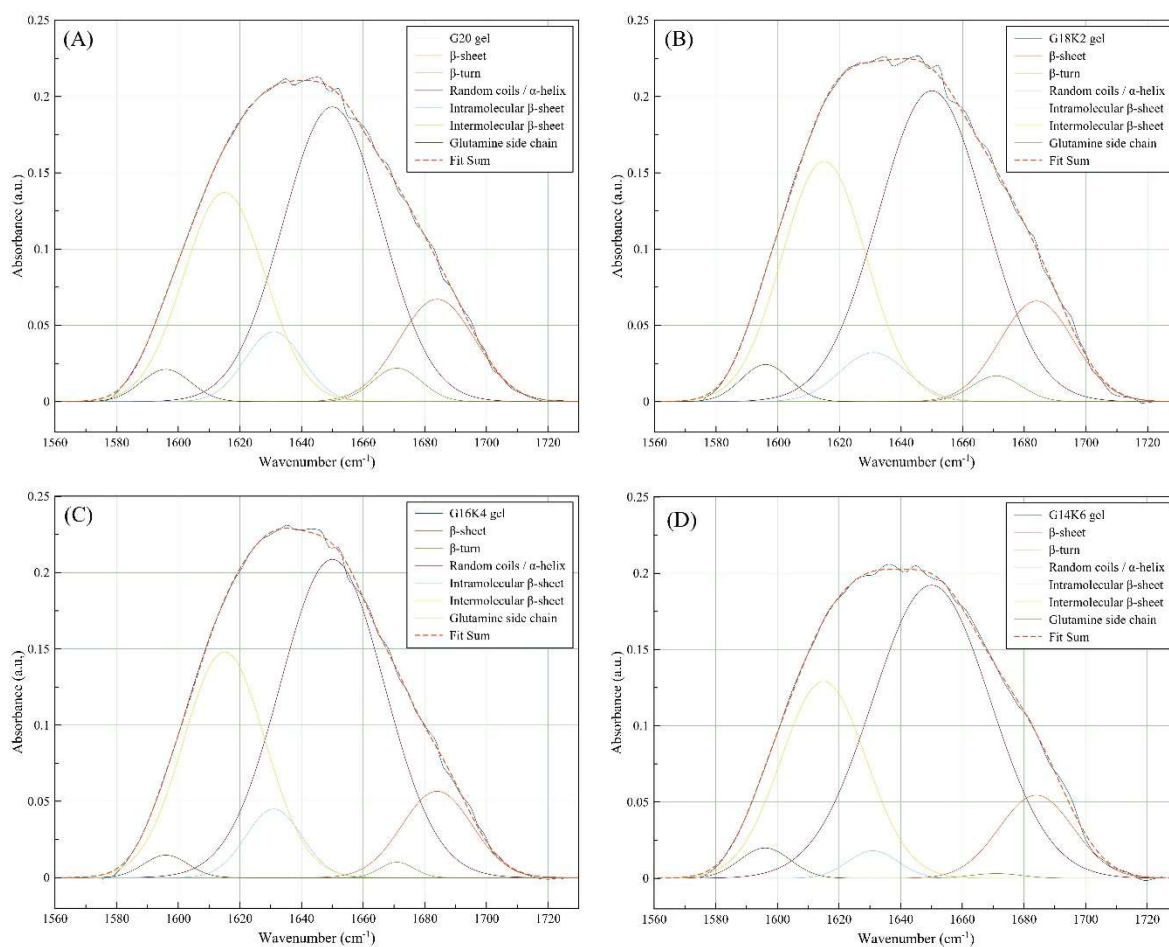

Figure S2: The deconvolution of the amide-I spectral region of the FTIR spectra of fabricated hydrogels.

## Reference:

1. Cardamone, J. M. Investigating the microstructure of keratin extracted from wool: Peptide sequence (MALDI-TOF/TOF) and protein conformation (FTIR). *J. Mol. Struct.* **2010**, 969, 97–105. <https://doi.org/10.1016/j.molstruc.2010.01.048>.
2. Georget, D. M. R.; Belton, P. S. Effects of temperature and water content on the secondary structure of wheat gluten studied by FTIR spectroscopy. *Biomacromolecules* **2006**, 7, 469–475. <https://doi.org/10.1021/bm050667j>.
